# Supplementary material for: GADD45B Transcript Is a Prognostic Marker in Papillary Thyroid Carcinoma Patients Treated With Total Thyroidectomy and Radioiodine Therapy
Source: Front Endocrinol (Lausanne). 2020 Apr 30;11:269. doi: 10.3389/fendo.2020.00269 (PMC7203742; doi:10.3389/fendo.2020.00269)
Supplement: Supplementary file 4 [file Table_1.XLSX]

## Sheet: Table S1
	Supplementary Table 1. Clinical and pathological characteristics of the papillary thyroid carcinoma patients included in the study.
	Characteristics	Microarray Analysis N= 48 (%)	Total Number of Cases N= 202 (%)
	Age; median (IQ range)	40.1 (32.5-48.1)	40.5 (32.2-49.1)
	<55 years	42 (87.5)	175 (86.6)
	≥55years	6 (12.5)	27 (13.4)
	Gender
	Female	35 (72.9)	155 (76.7)
	Male	13 (27.1)	47 (23.3)
	Tumor size; median (IQ range)	1.2 (0.9-1.7)	1.2 (0.8-1.8)
	≤1cm	26 (54.2)	111 (55)
	>1cm	22 (45.8)	91 (45)
	Multicentricity
	No	24 (50)	113 (57.1)
	Yes	24 (50)	85 (42.9)
	Ni	0	4
	Predominant variant
	Classic	37 (77.1)	150 (74.3)
	Follicular	7 (14.6)	37 (18.3)
	Other*	4 (8.3)	15 (7.4)
	Vascular/perineural invasion
	No	44 (91.7)	179 (90.4)
	Yes	4 (8.3)	19 (9.6)
	Ni	0	4
	Extrathyroidal extension
	No	27 (56.3)	116 (59.2)
	Yes	21 (43.8)	80 (40.8)
	Ni	0	6
	Associated thyroiditis
	No	18 (47.4)	102 (59.6)
	Yes	20 (52.6)	69 (40.4)
	Ni	10	31
	Lymph node metastasis
	No (cN0, pN0)	30 (62.5)	134 (66.3)
	Yes (pN1)	18 (37.5)	68 (33.7)
	Distant metastases
	No	47 (97.9)	198 (98)
	Yes	1 (2.1)	4 (2)
	Clinical outcome
	Favorable (disease-free)	35 (72.9)	169 (83.7)
	Recurrence	13 (27.1)	33 (16.3)
	Follow-up (disease-free group)
	≥10 years	35 (100)	117 (69.2)
	<10 years	0 (0)	52 (30.8)
	Death
	No	48 (100)	200 (99)
	Yes	0 (0)	2 (1)
	BRAF mutation
	No	14 (29.2)	76 (37.6)
	Yes	34 (70.8)	126 (62.4)
	Ni	0	0
	RAS mutation
	No	48 (100)	193 (97.5)
	Yes	0 (0)	5 (2.5)
	Ni	0	4
	RET rearrangement
	No	44 (91.7)	158 (90.8)
	Yes	4 (8.3)	16 (9.2)
	Ni	0	28
	TERT promoter mutation
	No	45 (100)	188 (97.4)
	Yes	0 (0)	5 (2.6)
	Ni	3	9
	Legend. Ni: not informed; IQ: interquartile; cN0: no clinical evidence of lymph nodes involvement; pN0: no pathologically evidence of lymph nodes involvement; pN1: pathological confirmation of lymph nodes involvement; *tall cells, oncocytic, sclerosing and solid variants; #three patients presented only imaging tests (PET-CT or CT) with biochemical evidence (high serum thyroglobulin) of active dis…
