# Supplementary material for: GADD45B Transcript Is a Prognostic Marker in Papillary Thyroid Carcinoma Patients Treated With Total Thyroidectomy and Radioiodine Therapy
Source: Front Endocrinol (Lausanne). 2020 Apr 30;11:269. doi: 10.3389/fendo.2020.00269 (PMC7203742; doi:10.3389/fendo.2020.00269)
Supplement: Supplementary file 5 [file Table_2.XLSX]

## Sheet: Table S2
	Supplementary Table 2. Differentially expressed genes in primary PTC of patients with recurrence in the follow-up compared to those with favorable clinical outcome.
	Gene symbol	Approved name	mean FCO	mean RE	FC	P value	FDR
	SLC2A4	solute carrier family 2 member 4	-0.616708	-1.71164	2.13603	4.62395e-05	0.164758
	CSRNP1	cysteine and serine rich nuclear protein 1	-0.34411	-1.00014	1.57574	0.000187805	0.273919
	FOXP2	forkhead box P2	-0.943005	-1.57067	1.54506	0.000338542	0.359063
	CCL25	C-C motif chemokine ligand 25	-0.0822406	0.531548	-1.53027	0.000505402	0.378192
	APOLD1	apolipoprotein L domain containing 1	-0.148302	-1.01819	1.82752	0.000604143	0.378192
	SERTAD3	SERTA domain containing 3	0.45354	-0.198867	1.57179	0.000605201	0.378192
	GADD45B	growth arrest and DNA damage inducible beta	-0.47931	-1.41876	1.91779	0.00074533	0.378192
	HGD	homogentisate 1,2-dioxygenase	-1.60895	-2.32601	1.64384	0.000915483	0.378192
	EXO1	exonuclease 1	0.494424	1.13357	-1.55741	0.00102429	0.378192
	PPP1R15A	protein phosphatase 1 regulatory subunit 15A	-0.521133	-1.13866	1.53424	0.00104949	0.378192
	DDIT4	DNA damage inducible transcript 4	1.33331	0.553046	1.71745	0.00108639	0.378192
	JUND	JunD proto-oncogene, AP-1 transcription factor subunit	-0.0469929	-0.777189	1.65886	0.00111467	0.378192
	CCDC65	coiled-coil domain containing 65	-0.774779	-1.52562	1.68278	0.0011506	0.378192
	KCNJ1	potassium voltage-gated channel subfamily J member 1	-0.420328	-1.13395	1.63992	0.00115714	0.378192
	KLF6	Kruppel like factor 6	-0.229945	-0.913944	1.60659	0.00123203	0.378192
	ZNF730	zinc finger protein 730	0.900732	2.00655	-2.15221	0.00129554	0.380062
	SLC22A4	solute carrier family 22 member 4	1.02935	1.68198	-1.57203	0.0014919	0.384109
	F2RL3	F2R like thrombin/trypsin receptor 3	-0.0994527	-0.728163	1.54618	0.00157586	0.384109
	TAL1	TAL bHLH transcription factor 1, erythroid differentiation factor	-0.521584	-1.26073	1.66919	0.00171324	0.384109
	WEE1	WEE1 G2 checkpoint kinase	0.0619649	-0.546475	1.52461	0.00179074	0.384109
	GNA14	G protein subunit alpha 14	-1.49887	-2.09938	1.51626	0.00203308	0.406263
	RHOB	ras homolog family member B	0.232196	-0.362117	1.50975	0.00215001	0.407548
	PER1	period circadian clock 1	0.178214	-0.57284	1.68302	0.00224042	0.411856
	CHEK1	checkpoint kinase 1	0.827751	1.49608	-1.58924	0.00243058	0.419793
	GAS2L3	growth arrest specific 2 like 3	0.473824	1.16503	-1.61463	0.0028615	0.430261
	GRIK4	glutamate ionotropic receptor kainate type subunit 4	-0.981264	-1.57151	1.5055	0.00294755	0.430261
	EIF5	eukaryotic translation initiation factor 5	-2.40134	-1.80332	-1.51364	0.00299319	0.430261
	SH2D6	SH2 domain containing 6	-1.87308	-2.60655	1.66263	0.00316653	0.430261
	PPP1R3C	protein phosphatase 1 regulatory subunit 3C	-1.27058	-0.588141	-1.60485	0.0032577	0.430261
	FLRT1	fibronectin leucine rich transmembrane protein 1	-1.21721	-2.22684	2.01339	0.00326864	0.430261
	IQCH	IQ motif containing H	-0.681937	-1.34909	1.58794	0.0034097	0.435551
	ZFP36	ZFP36 ring finger protein	-0.45682	-1.53219	2.10726	0.0035138	0.437386
	DLGAP5	DLG associated protein 5	0.971376	1.7431	-1.70731	0.00378368	0.438104
	S1PR1	sphingosine-1-phosphate receptor 1	0.57593	-0.0118574	1.50294	0.00394001	0.438104
	F3	coagulation factor III, tissue factor	0.359632	-0.475918	1.78454	0.00423556	0.454129
	PRUNE2	prune homolog 2	-0.276518	0.551938	-1.77578	0.00496179	0.454129
	CFAP74	cilia and flagella associated protein 74	-0.616568	-1.74422	2.18502	0.00502872	0.454129
	SELENOV	selenoprotein V	-1.59583	-2.61254	2.0233	0.00507223	0.454129
	CLMP	CXADR like membrane protein	-0.874157	0.225165	-2.14254	0.00530797	0.468872
	TSC22D3	TSC22 domain family member 3	-0.0795	-0.761191	1.60402	0.00536668	0.468872
	PCDH7	protocadherin 7	0.820771	0.160135	1.58078	0.005849	0.468872
	KCNE4	potassium voltage-gated channel subfamily E regulatory subunit 4	0.205165	-0.408386	1.53002	0.0062424	0.49183
	CFAP126	cilia and flagella associated protein 126	-1.14587	-1.81885	1.59436	0.00659169	0.493658
	MRO	maestro	-2.09476	-2.7978	1.62793	0.00660663	0.493658
	GOLGA6L6	golgin A6 family-like 6	-0.416775	0.17418	-1.50624	0.006739	0.493658
	ZBTB16	zinc finger and BTB domain containing 16	-0.862167	-1.58725	1.65299	0.00678877	0.493658
	ELMO1	engulfment and cell motility 1	-1.22204	-1.89704	1.5966	0.00701973	0.493658
	GPR83	G protein-coupled receptor 83	-1.84497	-2.85919	2.01981	0.00729094	0.493658
	F2RL2	coagulation factor II thrombin receptor like 2	1.87032	3.21266	-2.53561	0.00732804	0.493658
	SERPIND1	serpin family D member 1	-0.880462	-1.51734	1.55497	0.00746994	0.493658
	JSRP1	junctional sarcoplasmic reticulum protein 1	0.854414	1.96159	-2.15423	0.00749742	0.493658
	APOA1	apolipoprotein A1	-0.971217	-1.65962	1.6115	0.0077585	0.506601
	FOXA2	forkhead box A2	-1.66824	-2.93085	2.39929	0.00830578	0.513604
	RAG2	recombination activating 2	-1.5319	-2.25314	1.6486	0.00847946	0.513604
	JUNB	JunB proto-oncogene, AP-1 transcription factor subunit	-0.163467	-0.827488	1.58449	0.00849471	0.513604
	CPS1	carbamoyl-phosphate synthase 1	-1.04515	-1.86846	1.76946	0.00864228	0.513604
	ZNF850	zinc finger protein 850	-1.82838	-0.964652	-1.81973	0.00884131	0.513604
	IPCEF1	interaction protein for cytohesin exchange factors 1	-2.38416	-3.0395	1.57498	0.00884709	0.513604
	NR4A3	nuclear receptor subfamily 4 group A member 3	-1.9945	-3.04207	2.06705	0.00895456	0.513604
	DAPL1	death associated protein like 1	0.210757	1.18476	-1.96429	0.00897727	0.513604
	PNPLA3	patatin like phospholipase domain containing 3	-0.53458	0.147022	-1.60392	0.00961963	0.520139
	Legend. FC: Fold change; FDR: False discovery rate; FCO: favorable clinical outcome; RE: recurrence; P value: obtained by limma; *Mean values of Cy3/Cy5 ratio (log2).
